# Supplementary material
Source: MDPI journal article supplement (https://www.mdpi.com/2073-4441/9/9/708)

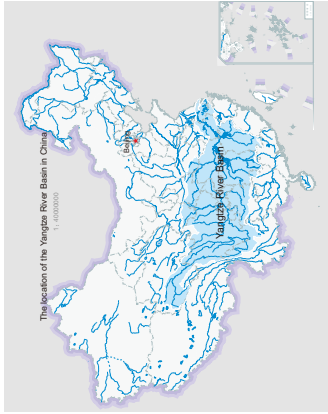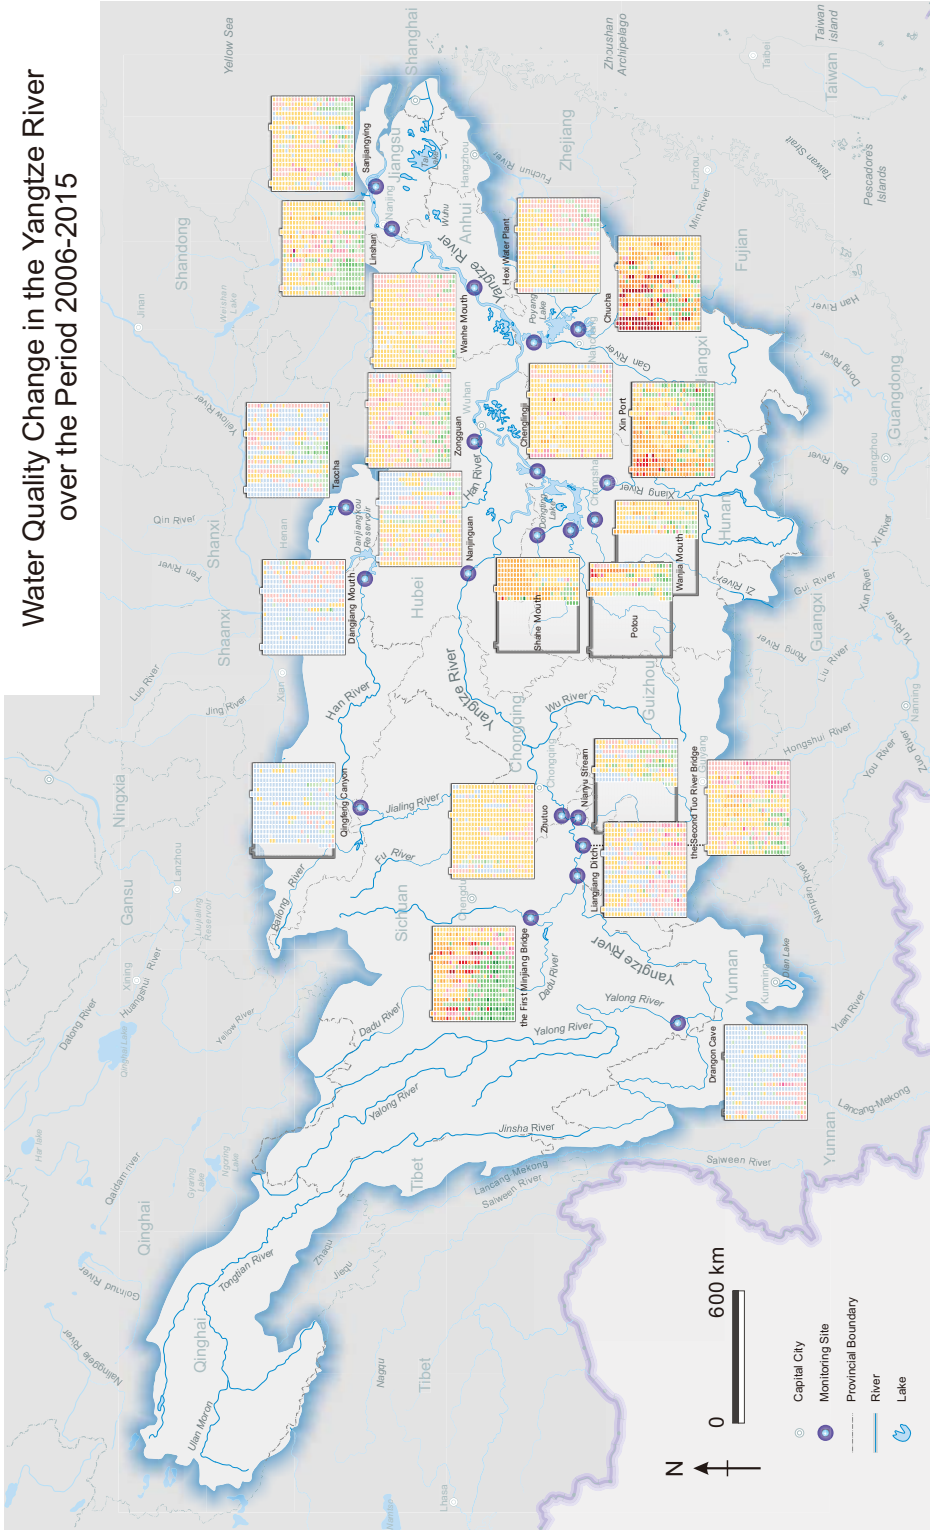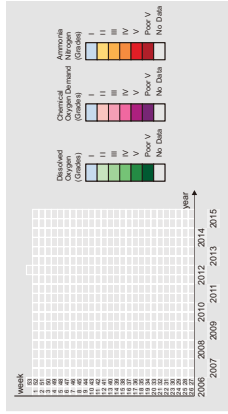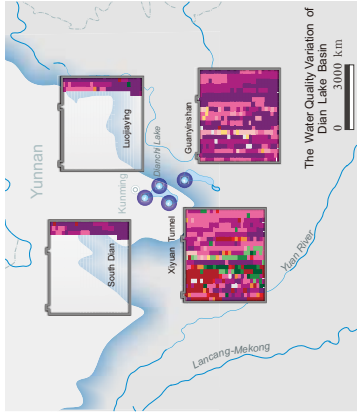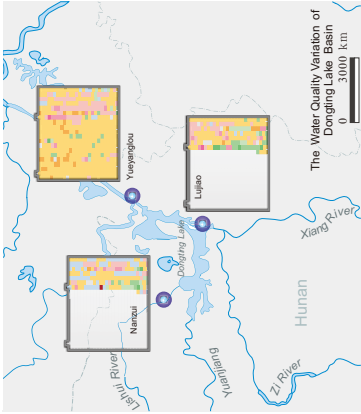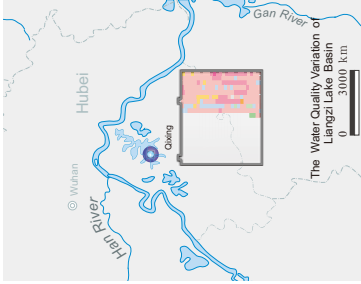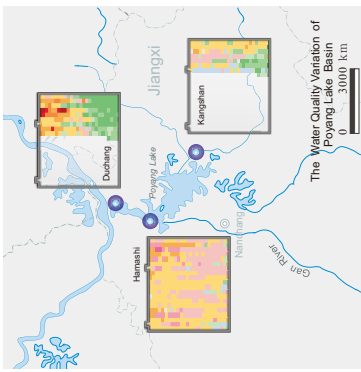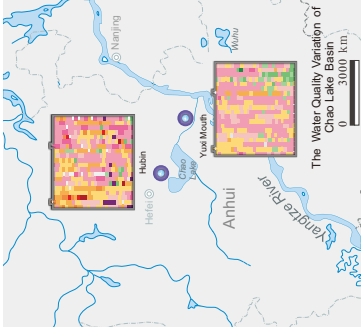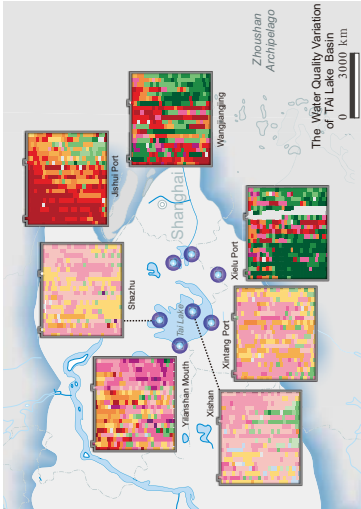

Supplement: s1 [file s1]
